# Supplementary material for: Identification of pheromone components and their binding affinity to the odorant binding protein CcapOBP83a-2 of the Mediterranean fruit fly, Ceratitis capitata
Source: PubMed Central journal article supplement (PMC4003389; doi:10.1016/j.ibmb.2014.02.005), 2014-05
Supplement: mmc1.pdf [file mmc1.pdf]

A. mRNA (699)

ACGTTAAACGAATTCCACCTCAACAGTGAATGTGGCAAGAGCAAGCACAATTTGACTAAAAATAACC  
AATTTAATTTACAGCTAAATAAAATGTATATCCTGAGAACCATTTTGGGTGCTTTGCTGTGGTGCAGC  
GTTTTGCTGAATCTCATATGGGCACAAAAGGAGTTAAGACGTGATGAACTTATCCTCCGCCGGAAC  
GCTAGAGGCGCTCAGACCAGTACACGATAAGTGTGTGCCAAAACCGGTGTTACAGAAGAGGCCATAA  
AGGAGTTCAGTGATGGTGAGATACACGAAGATGAGCCACTCAAGTGCTATATGTACTGTGTGTTGAA  
GAAACGGATGTTTTGCATGAAGACGGCGAAGTGCATTTAGAGAAATTATTGGATAGTTTGCCGAACTC  
AATGCACAACATCGCTTTGCATATGGGCAAGAAGTGTGTGATCCCAAGGGTGACACGAAATGTGAAC  
GCGCTTTTTGGTTACATCGCTGCTGGAAGGAGTCGGATCCAAAAGCACTATTTCTTGATTTGAGAGCCG  
CTTCATTGGAGGTCTTTCACAGCTGACTCTGCTTTTTGACAATGTGAATACTGAACTTACATACATAAT  
ATGTATTAATCTTTATTGTAGTCTTTTGGTTTATTATAATTTGCAAATATAGTTTAAACGAACATTTCCA  
AAAAAAAAAAAAAAAAAAAA

B. CDS (447)

ATGTATATCCTGAGAACCATTTTGGGTGCTTTGCTGTGGTGCAGCGTTTTGCTGAATCTCATATGGGC  
ACAAAAGGAGTTAAGACGTGATGAACTTATCCTCCGCCGGAACGCTAGAGGCGCTCAGACCAGTAC  
ACGATAAGTGTGTTGCCAAAACCGGTGTTACAGAAGAGGCCATAAAGGAGTTCAGTGATGGTGAGATA  
CACGAAGATGAGCCACTCAAGTGCTATATGTACTGTGTGTTGGAAGAAACGGATGTTTTGCATGAAGA  
CGGCGAAGTGCATTTAGAGAAATTATTGGATAGTTTGGCGAACTCAATGCACAACATCGCTTTGCATA  
TGGGCAAGAAGTGTGTGATCCCAAGGGTGACACGAAATGTGAACGCGCTTTTTGGTTACATCGCTGC  
TGGAAGGAGTCGGATCCAAAGCACTATTTCTTGATTTGA

C. Amino acid (148 aa - 17.4 Kdalton)

MYILRTILGALLWCSVLLNLIWAQKELRRDETYPPPELLEALRPVHDKCVAKTGVTEEAIKEFSDEI  
HEDEPLKCYMYCVFEETDVLHEDGEVHLEKLLDLSLPSMHNIALHMGKKCLYPKGDTKCERAFWLHRC  
WKESDPKHYFLI
