# Supplementary material for: Identification of pheromone components and their binding affinity to the odorant binding protein CcapOBP83a-2 of the Mediterranean fruit fly, Ceratitis capitata
Source: PubMed Central journal article supplement (PMC4003389; doi:10.1016/j.ibmb.2014.02.005), 2014-05

Supplementary Figure S2

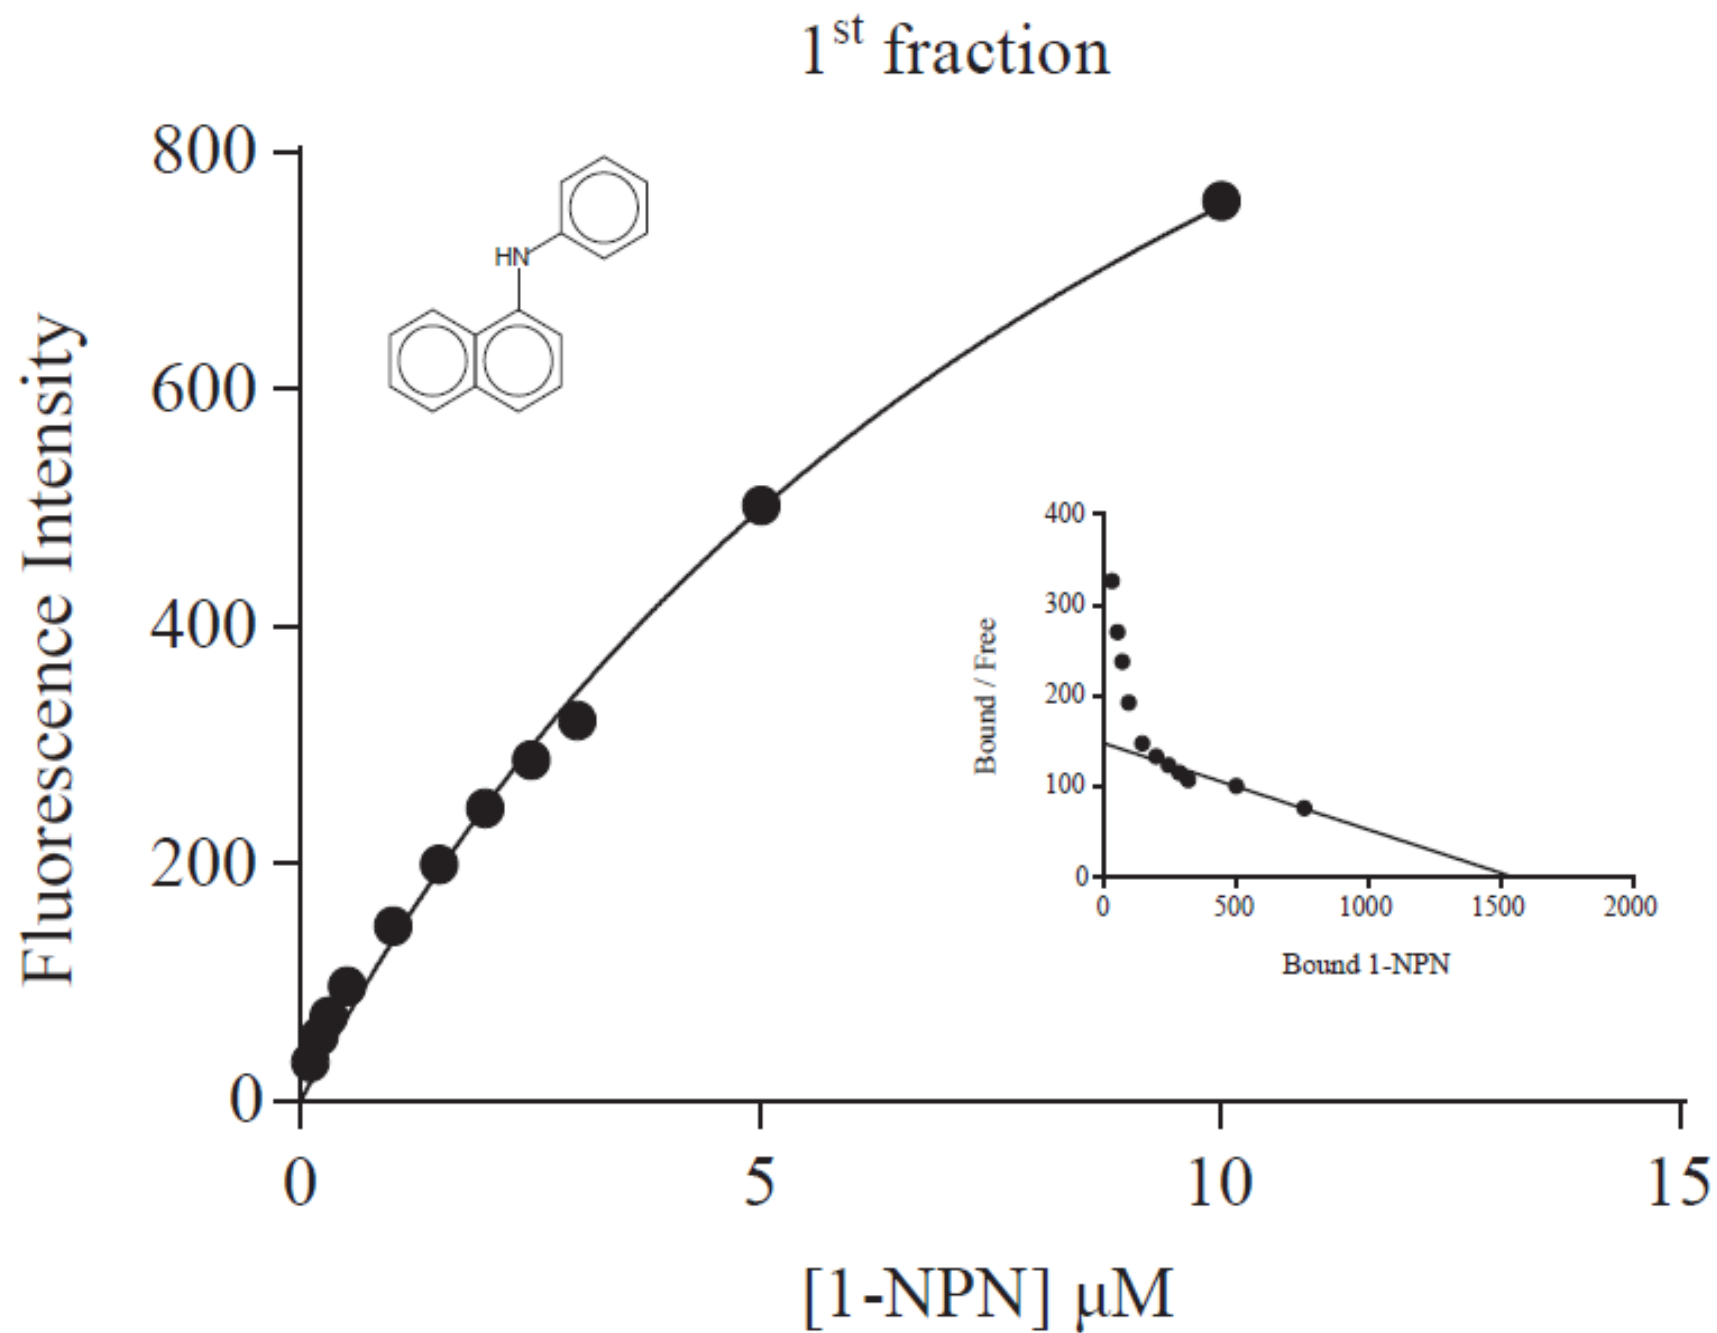

Supplement: mmc2.pdf [file mmc2.pdf]
